# Supplementary material for: Construction of a High-Density Genetic Map and Mapping of Firmness in Grapes (Vitis vinifera L.) Based on Whole-Genome Resequencing
Source: PubMed Central journal article supplement (PMC7037167; doi:10.3390/ijms21030797), 2020-01-25
Supplement: ijms-21-00797-s001.pdf [file ijms-21-00797-s001.pdf]

**Table S1.** Summary and mapping statistics of genome re-sequencing data of hybrids and parents.

| Sample     | Length (bp) | Clean Reads | Clean Data (bp) | Q30 (%) | GC Rate (%) | Coverage Rate (%) | Map Bases Rate (%) | Uni Hit Bases Rate(%) | Effective Depth (x) |
|------------|-------------|-------------|-----------------|---------|-------------|-------------------|--------------------|-----------------------|---------------------|
| Mascot     | 150         | 145657038   | 21848555700     | 92.88   | 37.24       | 94.26             | 96.3               | 71.76                 | 44.93               |
| Hamburg ♀  | 150         | 145657038   | 21848555700     | 92.88   | 37.24       | 94.26             | 96.3               | 71.76                 | 44.93               |
| Crimson    | 150         | 152526478   | 22878971700     | 92.66   | 37.51       | 93.49             | 95.48              | 70.39                 | 47.05               |
| Seedless ♂ | 150         | 152526478   | 22878971700     | 92.66   | 37.51       | 93.49             | 95.48              | 70.39                 | 47.05               |
| J1         | 150         | 54356636    | 8153495400      | 93.06   | 36.53       | 92.95             | 96.34              | 68.09                 | 16.77               |
| J2         | 150         | 54073294    | 8110994100      | 93.28   | 36.57       | 91.61             | 96.43              | 69.36                 | 16.68               |
| J3         | 150         | 48914452    | 7337167800      | 93.30   | 36.63       | 91.34             | 96.64              | 68.93                 | 15.09               |
| J4         | 150         | 49289762    | 7393464300      | 93.21   | 36.49       | 91.92             | 96.27              | 71.83                 | 15.20               |
| J5         | 150         | 56565216    | 8484782400      | 93.16   | 36.20       | 92.22             | 96.32              | 68.60                 | 17.45               |
| J6         | 150         | 37840098    | 5676014700      | 93.51   | 36.60       | 91.61             | 96.45              | 79.14                 | 11.67               |
| J7         | 150         | 57478814    | 8621822100      | 93.31   | 36.56       | 92.09             | 96.71              | 69.04                 | 17.73               |
| J9         | 150         | 42282434    | 6342365100      | 93.31   | 36.28       | 90.95             | 96.84              | 69.88                 | 13.04               |
| J10        | 150         | 48116080    | 7217412000      | 92.93   | 36.45       | 91.89             | 96.47              | 70.32                 | 14.84               |
| J11        | 150         | 44665020    | 6699753000      | 93.12   | 36.39       | 91.79             | 96.34              | 70.58                 | 13.78               |
| J12        | 150         | 56764950    | 8514742500      | 93.41   | 36.33       | 92.27             | 96.46              | 67.96                 | 17.51               |
| J13        | 150         | 44460794    | 6669119100      | 93.17   | 36.45       | 91.4              | 96.01              | 69.84                 | 13.71               |
| J14        | 150         | 48207946    | 7231191900      | 93.51   | 36.48       | 92.18             | 96.74              | 78.35                 | 14.87               |
| J15        | 150         | 53393660    | 8009049000      | 93.39   | 36.78       | 92.30             | 96.46              | 70.78                 | 16.47               |
| J16        | 150         | 53974290    | 8096143500      | 93.32   | 36.55       | 92.05             | 95.47              | 69.04                 | 16.65               |
| J17        | 150         | 47105986    | 7065897900      | 93.53   | 36.86       | 91.33             | 96.03              | 71.07                 | 14.53               |
| J19        | 150         | 57169648    | 8575447200      | 93.23   | 36.62       | 91.81             | 96.38              | 70.37                 | 17.64               |
| J20        | 150         | 59497052    | 8924557800      | 93.50   | 36.46       | 92.03             | 96.45              | 69.19                 | 18.35               |
| J24        | 150         | 52311360    | 7846704000      | 93.24   | 36.63       | 91.83             | 95.10              | 67.44                 | 16.14               |
| J25        | 150         | 44072876    | 6610931400      | 93.63   | 36.56       | 91.14             | 96.48              | 68.71                 | 13.60               |
| J27        | 150         | 49347012    | 7402051800      | 93.43   | 36.69       | 91.86             | 96.44              | 68.45                 | 15.22               |
| J28        | 150         | 48602326    | 7290348900      | 92.97   | 36.81       | 92.09             | 96.32              | 68.47                 | 14.99               |
| J29        | 150         | 47194466    | 7079169900      | 93.00   | 36.77       | 91.56             | 96.05              | 68.36                 | 14.56               |
| J30        | 150         | 54402750    | 8160412500      | 92.60   | 36.92       | 92.09             | 96.40              | 69.93                 | 16.78               |
| J31        | 150         | 52619468    | 7892920200      | 93.50   | 36.79       | 92.04             | 96.26              | 67.75                 | 16.23               |
| J33        | 150         | 64295506    | 9644325900      | 93.13   | 36.94       | 92.20             | 96.58              | 67.74                 | 19.83               |

|     |     |          |            |       |       |       |       |       |       |
|-----|-----|----------|------------|-------|-------|-------|-------|-------|-------|
| J35 | 150 | 55064188 | 8259628200 | 93.19 | 36.6  | 91.35 | 96.15 | 68.38 | 16.99 |
| J36 | 150 | 58654068 | 8798110200 | 93.16 | 36.94 | 91.48 | 96.33 | 68.61 | 18.09 |
| J37 | 150 | 46181194 | 6927179100 | 93.53 | 36.75 | 91.47 | 96.65 | 69.38 | 14.25 |
| J39 | 150 | 50773260 | 7615989000 | 93.39 | 36.52 | 90.91 | 96.31 | 68.19 | 15.66 |
| J40 | 150 | 46212874 | 6931931100 | 93.22 | 36.77 | 91.83 | 96.58 | 69.06 | 14.26 |
| J41 | 150 | 47547372 | 7132105800 | 93.03 | 37.05 | 91.45 | 96.08 | 68.48 | 14.67 |
| J42 | 150 | 48946796 | 7342019400 | 93.35 | 36.91 | 91.65 | 96.36 | 70.50 | 15.10 |
| J43 | 150 | 44048252 | 6607237800 | 93.49 | 36.54 | 91.67 | 96.11 | 76.25 | 13.59 |
| J44 | 150 | 42302214 | 6345332100 | 92.97 | 36.75 | 91.13 | 96.44 | 70.48 | 13.05 |
| J45 | 150 | 53047626 | 7957143900 | 93.59 | 36.75 | 91.64 | 96.10 | 69.01 | 16.36 |
| J46 | 150 | 51659954 | 7748993100 | 91.96 | 36.85 | 91.85 | 96.01 | 67.36 | 15.94 |
| J47 | 150 | 57732310 | 8659846500 | 93.22 | 36.43 | 92.43 | 96.5  | 67.66 | 17.81 |
| J49 | 150 | 53975532 | 8096329800 | 93.25 | 36.26 | 91.49 | 96.23 | 68.54 | 16.65 |
| J50 | 150 | 58290834 | 8743625100 | 93.15 | 36.69 | 91.87 | 96.36 | 68.30 | 17.98 |
| J51 | 150 | 55955780 | 8393367000 | 93.23 | 36.63 | 91.49 | 96.31 | 67.14 | 17.26 |
| J52 | 150 | 64930284 | 9739542600 | 92.94 | 36.84 | 92.50 | 96.30 | 68.57 | 20.03 |
| J53 | 150 | 55642704 | 8346405600 | 92.91 | 36.85 | 92.42 | 96.21 | 69.03 | 17.16 |
| J54 | 150 | 42368148 | 6355222200 | 93.57 | 36.40 | 91.35 | 96.40 | 77.10 | 13.07 |
| J55 | 150 | 46890824 | 7033623600 | 93.38 | 36.60 | 91.43 | 96.36 | 71.67 | 14.46 |
| J56 | 150 | 53114834 | 7967225100 | 93.13 | 36.72 | 91.76 | 96.43 | 67.35 | 16.38 |
| J57 | 150 | 55673878 | 8351081700 | 93.44 | 36.37 | 91.84 | 96.75 | 67.02 | 17.17 |
| J58 | 150 | 55472644 | 8320896600 | 93.18 | 36.27 | 91.82 | 96.50 | 71.02 | 17.11 |
| J60 | 150 | 50029196 | 7504379400 | 92.71 | 37.07 | 91.87 | 96.31 | 70.87 | 15.43 |
| J61 | 150 | 56875828 | 8531374200 | 92.91 | 36.60 | 91.92 | 96.4  | 69.29 | 17.54 |
| J62 | 150 | 52981368 | 7947205200 | 92.64 | 36.92 | 91.57 | 95.9  | 71.25 | 16.34 |
| J63 | 150 | 49934136 | 7490120400 | 92.55 | 36.99 | 91.92 | 96.44 | 70.57 | 15.40 |
| J64 | 150 | 57680396 | 8652059400 | 92.82 | 37.07 | 91.61 | 96.26 | 68.9  | 17.79 |
| J65 | 150 | 49223354 | 7383503100 | 92.75 | 37.18 | 91.51 | 95.99 | 69.61 | 15.18 |
| J67 | 150 | 42966780 | 6445017000 | 93.00 | 36.64 | 91.35 | 96.12 | 70.92 | 13.25 |
| J68 | 150 | 44983640 | 6747546000 | 92.42 | 37.28 | 91.04 | 95.79 | 70.9  | 13.88 |
| J69 | 150 | 42163032 | 6324454800 | 93.23 | 36.68 | 91.56 | 96.52 | 78.83 | 13.01 |
| J70 | 150 | 47117258 | 7067588700 | 92.81 | 36.73 | 91.41 | 96.46 | 71.26 | 14.53 |
| J72 | 150 | 49247832 | 7387174800 | 93.35 | 36.61 | 91.89 | 96.31 | 76.64 | 15.19 |
| J75 | 150 | 43328822 | 6499323300 | 92.52 | 36.77 | 91.50 | 96.14 | 71.45 | 13.37 |

|      |     |          |            |       |       |       |       |       |       |
|------|-----|----------|------------|-------|-------|-------|-------|-------|-------|
| J76  | 150 | 49026984 | 7354047600 | 92.80 | 37.29 | 91.72 | 96.07 | 69.51 | 15.12 |
| J77  | 150 | 53217240 | 7982586000 | 93.04 | 36.99 | 91.5  | 96.39 | 68.12 | 16.42 |
| J78  | 150 | 64985714 | 9747857100 | 93.33 | 36.95 | 92.24 | 96.58 | 68.03 | 20.05 |
| J80  | 150 | 57630602 | 8644590300 | 92.61 | 37.18 | 92.68 | 96.18 | 70.44 | 17.78 |
| J81  | 150 | 45872888 | 6880933200 | 93.20 | 36.94 | 91.37 | 96.11 | 77.32 | 14.15 |
| J83  | 150 | 44099540 | 6614931000 | 93.45 | 36.72 | 91.55 | 96.00 | 72.70 | 13.60 |
| J85  | 150 | 44489636 | 6673445400 | 92.95 | 37.86 | 91.35 | 96.04 | 70.75 | 13.72 |
| J86  | 150 | 46302318 | 6945347700 | 93.82 | 36.63 | 91.66 | 96.53 | 71.72 | 14.28 |
| J87  | 150 | 65535548 | 9830332200 | 93.37 | 36.60 | 91.97 | 96.61 | 70.90 | 20.22 |
| J89  | 150 | 55707088 | 8356063200 | 93.78 | 36.50 | 91.53 | 96.28 | 70.02 | 17.18 |
| J90  | 150 | 53554676 | 8033201400 | 93.90 | 36.91 | 92.54 | 96.31 | 70.86 | 16.52 |
| J91  | 150 | 49427918 | 7414187700 | 93.81 | 37.60 | 91.10 | 96.14 | 70.62 | 15.25 |
| J92  | 150 | 56970024 | 8545503600 | 94.05 | 36.41 | 91.87 | 96.53 | 69.79 | 17.57 |
| J93  | 150 | 48400486 | 7260072900 | 94.05 | 37.21 | 91.07 | 96.36 | 71.46 | 14.93 |
| J94  | 150 | 48251552 | 7237732800 | 93.64 | 37.01 | 91.77 | 96.59 | 70.06 | 14.88 |
| J96  | 150 | 54162762 | 8124414300 | 93.63 | 36.63 | 91.96 | 96.49 | 69.98 | 16.71 |
| J97  | 150 | 46565968 | 6984895200 | 93.71 | 37.00 | 91.02 | 95.91 | 70.89 | 14.36 |
| J98  | 150 | 46279870 | 6941980500 | 93.33 | 36.78 | 91.48 | 96.61 | 71.48 | 14.28 |
| J99  | 150 | 59625026 | 8943753900 | 93.42 | 36.42 | 91.74 | 96.52 | 70.82 | 18.39 |
| J101 | 150 | 45876390 | 6881458500 | 93.67 | 36.76 | 90.98 | 96.18 | 72.17 | 14.15 |
| J102 | 150 | 46875548 | 7031332200 | 93.31 | 36.75 | 91.44 | 96.48 | 73.21 | 14.46 |
| J106 | 150 | 52248418 | 7837262700 | 93.56 | 36.62 | 91.78 | 96.22 | 71.63 | 16.12 |
| J107 | 150 | 50148798 | 7522319700 | 93.21 | 36.54 | 91.63 | 96.52 | 71.27 | 15.47 |
| J108 | 150 | 44166836 | 6625025400 | 93.50 | 36.71 | 91.63 | 96.5  | 77.89 | 13.62 |
| J110 | 150 | 55238878 | 8285831700 | 92.92 | 37.41 | 91.71 | 96.48 | 69.23 | 17.04 |
| J111 | 150 | 50169044 | 7525356600 | 93.03 | 36.56 | 91.59 | 96.20 | 69.6  | 15.48 |
| J113 | 150 | 47377364 | 7106604600 | 92.90 | 36.76 | 91.44 | 96.32 | 70.73 | 14.61 |
| J114 | 150 | 45190664 | 6778599600 | 93.45 | 36.52 | 91.86 | 96.33 | 72.00 | 13.94 |
| J115 | 150 | 49067250 | 7360087500 | 93.22 | 36.72 | 91.08 | 96.32 | 71.32 | 15.14 |
| J116 | 150 | 65234912 | 9785236800 | 93.50 | 36.63 | 92.06 | 96.41 | 70.80 | 20.12 |
| J117 | 150 | 52810780 | 7921617000 | 93.19 | 37.38 | 91.27 | 96.33 | 71.07 | 16.29 |
| J118 | 150 | 52315968 | 7847395200 | 92.83 | 37.29 | 91.95 | 96.39 | 71.49 | 16.14 |
| J119 | 150 | 54619830 | 8192974500 | 92.57 | 37.10 | 91.84 | 96.20 | 71.54 | 16.85 |
| J120 | 150 | 53327244 | 7999086600 | 92.59 | 36.95 | 92.59 | 95.96 | 72.60 | 16.45 |

|      |     |          |            |        |       |       |       |       |       |
|------|-----|----------|------------|--------|-------|-------|-------|-------|-------|
| J121 | 150 | 58106240 | 8715936000 | 92.76  | 36.85 | 92.67 | 96.46 | 70.05 | 17.92 |
| J122 | 150 | 45213372 | 6782005800 | 92.53  | 37.71 | 91.45 | 96.27 | 72.10 | 13.95 |
| J123 | 150 | 44999150 | 6749872500 | 93.045 | 37.74 | 91.56 | 96.50 | 73.99 | 13.88 |
| J124 | 150 | 47407802 | 7111170300 | 93.30  | 37.18 | 91.54 | 95.53 | 76.59 | 14.62 |
| J125 | 150 | 47113670 | 7067050500 | 93.17  | 37.67 | 90.86 | 96.23 | 72.94 | 14.53 |
| J126 | 150 | 40789428 | 6118414200 | 93.10  | 37.11 | 91.54 | 96.63 | 75.66 | 12.58 |
| J127 | 150 | 49057054 | 7358558100 | 93.37  | 37.02 | 91.86 | 96.33 | 78.48 | 15.13 |
| J128 | 150 | 52834030 | 7925104500 | 93.22  | 37.23 | 91.89 | 96.54 | 72.97 | 16.30 |
| J129 | 150 | 55661838 | 8349275700 | 93.71  | 36.70 | 91.20 | 96.45 | 72.46 | 17.17 |
| J130 | 150 | 52352204 | 7852830600 | 93.03  | 38.37 | 91.01 | 95.99 | 71.43 | 16.15 |
| J131 | 150 | 55045800 | 8256870000 | 93.46  | 36.64 | 92.13 | 96.54 | 72.64 | 16.98 |

---

**Table S2.** Characteristics of the linkage groups of Muscat hamburg genetic map.

| Linkage group | Chromosomes | Length (cM) | Number of SNP Markers | Number of Bin Markers | Max Gap (cM) | Gap <5cM (%) | Mean Markers Distance (cM) |
|---------------|-------------|-------------|-----------------------|-----------------------|--------------|--------------|----------------------------|
| LG1           | 1           | 54.07       | 298                   | 29                    | 10.74        | 99.33        | 1.86                       |
| LG2           | 2           | 70.38       | 226                   | 37                    | 7.75         | 98.67        | 1.90                       |
| LG3           | 3           | 77.35       | 42                    | 20                    | 46.52        | 95.24        | 3.87                       |
| LG4           | 4           | 74.15       | 625                   | 49                    | 5.80         | 99.68        | 1.51                       |
| LG5           | 5           | 102.46      | 523                   | 61                    | 14.85        | 99.62        | 1.68                       |
| LG6           | 6           | 16.36       | 53                    | 14                    | 3.85         | 100.00       | 1.17                       |
| LG7           | 7           | 98.14       | 650                   | 72                    | 3.85         | 100.00       | 1.36                       |
| LG8           | 8           | 79.93       | 395                   | 53                    | 6.77         | 99.24        | 1.51                       |
| LG9           | 9           | 76.15       | 1425                  | 57                    | 10.74        | 99.93        | 1.34                       |
| LG10          | 10          | 98.41       | 1440                  | 50                    | 21.41        | 99.93        | 1.97                       |
| LG11          | 11          | 66.87       | 384                   | 38                    | 13.80        | 99.48        | 1.76                       |
| LG12          | 12          | 95.89       | 458                   | 59                    | 16.97        | 99.56        | 1.63                       |
| LG13          | 13          | 100.75      | 983                   | 38                    | 27.47        | 99.49        | 2.65                       |
| LG14          | 14          | 94.89       | 1115                  | 62                    | 16.97        | 99.91        | 1.53                       |
| LG15          | 15          | 73.16       | 920                   | 44                    | 4.82         | 100.00       | 1.66                       |
| LG16          | 16          | 99.07       | 930                   | 86                    | 3.85         | 100.00       | 1.15                       |
| LG17          | 17          | 31.79       | 177                   | 21                    | 5.80         | 98.87        | 1.51                       |
| LG18          | 18          | 97.21       | 1344                  | 71                    | 6.77         | 99.85        | 1.37                       |
| LG19          | 19          | 87.53       | 961                   | 74                    | 2.89         | 100.00       | 1.18                       |
| Total         |             | 1494.56     | 12949                 | 935                   |              |              |                            |
| Average       |             | 78.66       | 682                   | 49.21                 | 12.19        | 99.41        | 1.60                       |

**Table S3.** Characteristics of the linkage groups of Crimson seedless genetic map.

| Linkage group | Chromosomes | Length (cM) | Number of SNP Markers | Number of Bin Markers | Max Gap (cM) | Gap <5cM (%) | Mean Markers Distance (cM) |
|---------------|-------------|-------------|-----------------------|-----------------------|--------------|--------------|----------------------------|
| LG1           | 1           | 76.20       | 105                   | 38                    | 7.75         | 96.19        | 2.01                       |
| LG2           | 2           | 68.31       | 325                   | 49                    | 3.85         | 100.00       | 1.39                       |
| LG3           | 3           | 105.17      | 436                   | 47                    | 35.88        | 99.77        | 2.24                       |
| LG4           | 4           | 87.84       | 108                   | 39                    | 32.89        | 97.22        | 2.25                       |
| LG5           | 5           | 90.40       | 798                   | 36                    | 20.27        | 99.62        | 2.51                       |
| LG6           | 6           | 79.91       | 254                   | 47                    | 5.80         | 99.61        | 1.70                       |
| LG7           | 7           | 85.77       | 525                   | 55                    | 9.74         | 99.62        | 1.56                       |
| LG8           | 8           | 60.76       | 77                    | 30                    | 7.75         | 94.81        | 2.03                       |
| LG9           | 9           | 79.95       | 1299                  | 53                    | 7.75         | 99.85        | 1.51                       |
| LG10          | 10          | 77.07       | 1081                  | 51                    | 8.74         | 99.82        | 1.51                       |
| LG11          | 11          | 56.83       | 394                   | 42                    | 8.74         | 99.75        | 1.35                       |
| LG12          | 12          | 82.74       | 886                   | 67                    | 4.82         | 100.00       | 1.23                       |
| LG13          | 13          | 91.51       | 1099                  | 59                    | 7.75         | 99.82        | 1.55                       |
| LG14          | 14          | 68.49       | 432                   | 39                    | 9.74         | 99.54        | 1.76                       |
| LG15          | 15          | 92.85       | 985                   | 49                    | 13.80        | 99.70        | 1.89                       |
| LG16          | 16          | 105.90      | 1730                  | 76                    | 20.27        | 99.88        | 1.39                       |
| LG17          | 17          | -           | -                     | -                     | -            | -            | -                          |
| LG18          | 18          | 102.20      | 2178                  | 71                    | 11.75        | 99.95        | 1.44                       |
| LG19          | 19          | 82.78       | 545                   | 65                    | 7.75         | 99.82        | 1.27                       |
| Total         |             | 1494.67     | 13257                 | 913                   |              |              |                            |
| Average       |             | 83.04       | 737                   | 50.72                 | 12.50        | 99.17        | 1.64                       |

**Table S4.** List of total genes for berry firmness identified in the quantitative trait loci region located on linkage group 18.

| <b>Gene ID</b>           | <b>Function Description</b>                                |
|--------------------------|------------------------------------------------------------|
| <i>VIT_18s0041g00250</i> | PREDICTED: TMV resistance protein N-like                   |
| <i>VIT_18s0041g00260</i> | hypothetical protein VITISV_006408                         |
| <i>VIT_18s0041g00270</i> | hypothetical protein VITISV_006408                         |
| <i>VIT_18s0041g00280</i> | PREDICTED: uncharacterized protein LOC100252816 isoform X1 |
| <i>VIT_18s0041g00290</i> | PREDICTED: E3 ubiquitin-protein ligase RNF170              |
| <i>VIT_18s0041g00330</i> | PREDICTED: uncharacterized protein LOC100244294 isoform X2 |
| <i>VIT_18s0041g00340</i> | PREDICTED: receptor-like protein 12                        |
| <i>VIT_18s0041g00350</i> | PREDICTED: carboxymethylenebutenolidase homolog            |
| <i>VIT_18s0041g00360</i> | PREDICTED: uncharacterized protein LOC100261433            |
| <i>VIT_18s0041g00370</i> | PREDICTED: cysteine proteinase inhibitor 8-like            |
| <i>VIT_18s0041g00380</i> | PREDICTED: DNA repair protein XRCC4 isoform X3             |
| <i>VIT_18s0041g00390</i> | PREDICTED: cysteine proteinase inhibitor 8-like            |
| <i>VIT_18s0041g00400</i> | unnamed protein product                                    |
| <i>VIT_18s0041g00410</i> | unnamed protein product                                    |
| <i>VIT_18s0041g00420</i> | hypothetical protein VITISV_013162                         |
| <i>VIT_18s0041g00430</i> | PREDICTED: patellin-3                                      |
| <i>VIT_18s0041g00440</i> | unnamed protein product                                    |
| <i>VIT_18s0041g00450</i> | unnamed protein product                                    |
| <i>VIT_18s0041g00480</i> | PREDICTED: uncharacterized protein LOC104878615, partial   |
| <i>VIT_18s0041g00490</i> | hypothetical protein VITISV_000973                         |
| <i>VIT_18s0041g00500</i> | unnamed protein product                                    |
| <i>VIT_18s0041g00510</i> | unnamed protein product                                    |
| <i>VIT_18s0041g00520</i> | PREDICTED: protein NRT1/ PTR FAMILY 5.10-like isoform X2   |
| <i>VIT_18s0041g00530</i> | unnamed protein product                                    |
| <i>VIT_18s0041g00540</i> | unnamed protein product                                    |
| <i>VIT_18s0041g00550</i> | PREDICTED: protein NRT1/ PTR FAMILY 5.10-like              |
| <i>VIT_18s0041g00560</i> | PREDICTED: protein NRT1/ PTR FAMILY 5.10-like              |
| <i>VIT_18s0041g00570</i> | unnamed protein product                                    |
| <i>VIT_18s0041g00580</i> | PREDICTED: uncharacterized protein LOC100854586            |
| <i>VIT_18s0041g00590</i> | PREDICTED: protein NRT1/ PTR FAMILY 5.10-like              |
| <i>VIT_18s0041g00600</i> | PREDICTED: protein NRT1/ PTR FAMILY 5.10-like              |
| <i>VIT_18s0041g00610</i> | unnamed protein product                                    |

|                          |                                                                  |
|--------------------------|------------------------------------------------------------------|
| VIT_18s0041g00630        | PREDICTED: protein NRT1/ PTR FAMILY 5.10-like                    |
| VIT_18s0041g00640        | unnamed protein product                                          |
| VIT_18s0041g00650        | PREDICTED: protein NRT1/ PTR FAMILY 5.10-like                    |
| VIT_18s0041g00660        | PREDICTED: protein NRT1/ PTR FAMILY 5.10-like                    |
| VIT_18s0041g00670        | PREDICTED: protein NRT1/ PTR FAMILY 5.10                         |
| VIT_18s0041g00680        | PREDICTED: transmembrane 9 superfamily member 1                  |
| VIT_18s0041g00690        | PREDICTED: transcription factor bHLH80-like isoform X2           |
| <b>VIT_18s0041g00700</b> | <b>PREDICTED: NAC domain-containing protein 90-like</b>          |
| VIT_18s0041g00710        | PREDICTED: anthocyanidin 5,3-O-glucosyltransferase               |
| VIT_18s0041g00720        | unnamed protein product                                          |
| VIT_18s0041g00730        | hypothetical protein VITISV_020937                               |
| VIT_18s0041g00740        | hypothetical protein VITISV_020938                               |
| VIT_18s0041g00750        | unnamed protein product                                          |
| VIT_18s0041g00770        | unnamed protein product                                          |
| VIT_18s0041g00790        | PREDICTED: anthocyanidin 5,3-O-glucosyltransferase               |
| VIT_18s0041g00800        | PREDICTED: anthocyanidin 5,3-O-glucosyltransferase-like          |
| VIT_18s0041g00810        | PREDICTED: UDP-glycosyltransferase 88A1-like                     |
| VIT_18s0041g00830        | hypothetical protein VITISV_020131                               |
| VIT_18s0041g00840        | PREDICTED: UDP-glycosyltransferase 88A1-like                     |
| VIT_18s0041g00850        | unnamed protein product                                          |
| VIT_18s0041g00860        | unnamed protein product                                          |
| VIT_18s0041g00870        | unnamed protein product                                          |
| VIT_18s0041g00890        | hypothetical protein VITISV_029184                               |
| VIT_18s0041g00900        | PREDICTED: anthocyanidin 5,3-O-glucosyltransferase-like          |
| VIT_18s0041g00910        | PREDICTED: UDP-glycosyltransferase 88A1-like                     |
| VIT_18s0041g00920        | PREDICTED: UDP-glycosyltransferase 88A1-like                     |
| VIT_18s0041g00930        | PREDICTED: anthocyanidin 5,3-O-glucosyltransferase-like, partial |
| VIT_18s0041g00940        | unnamed protein product                                          |
| VIT_18s0041g00950        | PREDICTED: UDP-glycosyltransferase 88A1-like                     |
| VIT_18s0041g00960        | unnamed protein product                                          |
| VIT_18s0041g00970        | PREDICTED: anthocyanidin 5,3-O-glucosyltransferase               |
| VIT_18s0041g00980        | PREDICTED: UDP-glycosyltransferase 88A1-like                     |
| VIT_18s0041g01000        | PREDICTED: UDP-glycosyltransferase 88A1-like                     |
| VIT_18s0041g01010        | hypothetical protein VITISV_001706                               |



|                   |                                                                                    |
|-------------------|------------------------------------------------------------------------------------|
| VIT_18s0041g01030 | unnamed protein product                                                            |
| VIT_18s0041g01040 | PREDICTED: UDP-glycosyltransferase 88A1-like                                       |
| VIT_18s0041g01050 | unnamed protein product                                                            |
| VIT_18s0041g01080 | PREDICTED: UDP-glycosyltransferase 88A1                                            |
| VIT_18s0041g01090 | PREDICTED: F-box/kelch-repeat protein At3g23880-like                               |
| VIT_18s0041g01100 | unnamed protein product                                                            |
| VIT_18s0041g01110 | PREDICTED: pentatricopeptide repeat-containing protein At3g13880 isoform X1        |
| VIT_18s0041g01130 | hypothetical protein VITISV_028402                                                 |
| VIT_18s0041g01140 | PREDICTED: probable L-type lectin-domain containing receptor kinase S.5            |
| VIT_18s0041g01150 | PREDICTED: uncharacterized protein LOC100246555                                    |
| VIT_18s0041g01160 | PREDICTED: probable L-type lectin-domain containing receptor kinase S.5            |
| VIT_18s0041g01170 | PREDICTED: probable L-type lectin-domain containing receptor kinase S.5            |
| VIT_18s0041g01180 | unnamed protein product                                                            |
| VIT_18s0041g01190 | unnamed protein product                                                            |
| VIT_18s0041g01210 | PREDICTED: probable L-type lectin-domain containing receptor kinase S.5 isoform X2 |
| VIT_18s0041g01220 | hypothetical protein VITISV_006706                                                 |
| VIT_18s0041g01230 | PREDICTED: stromal 70 kDa heat shock-related protein, chloroplastic-like           |
| VIT_18s0041g01240 | PREDICTED: amino acid permease 2-like                                              |
| VIT_18s0041g01250 | PREDICTED: amino acid permease 8-like                                              |
| VIT_18s0041g01260 | PREDICTED: type 1 phosphatases regulator ypi1-like                                 |
| VIT_18s0041g01270 | unnamed protein product                                                            |
| VIT_18s0041g01280 | unnamed protein product                                                            |
| VIT_18s0041g01290 | PREDICTED: serine/threonine-protein kinase-like protein CCR4                       |
| VIT_18s0041g01330 | unnamed protein product                                                            |
| VIT_18s0041g01340 | PREDICTED: TMV resistance protein N-like                                           |
| VIT_18s0041g01350 | PREDICTED: receptor-like protein kinase HAIKU2                                     |
| VIT_18s0041g01360 | PREDICTED: protein TIC 40, chloroplastic isoform X1                                |
| VIT_18s0041g01370 | unnamed protein product                                                            |
| VIT_18s0041g01380 | hypothetical protein VITISV_024045                                                 |
| VIT_18s0041g01390 | unnamed protein product                                                            |
| VIT_18s0041g01400 | PREDICTED: TMV resistance protein N-like                                           |
| VIT_18s0041g01410 | hypothetical protein VITISV_024045                                                 |
| VIT_18s0041g01420 | unnamed protein product                                                            |
| VIT_18s0041g01430 | unnamed protein product                                                            |

|                   |                                                                   |
|-------------------|-------------------------------------------------------------------|
| VIT_18s0041g01440 | hypothetical protein VITISV_013693                                |
| VIT_18s0041g01450 | PREDICTED: uncharacterized protein LOC100266406                   |
| VIT_18s0041g01460 | hypothetical protein VITISV_037610                                |
| VIT_18s0041g01470 | PREDICTED: TMV resistance protein N-like                          |
| VIT_18s0041g01500 | unnamed protein product                                           |
| VIT_18s0041g01510 | hypothetical protein VITISV_013692                                |
| VIT_18s0041g01520 | PREDICTED: TMV resistance protein N-like                          |
| VIT_18s0041g01530 | PREDICTED: beta-amyrin 28-oxidase-like                            |
| VIT_18s0041g01550 | uncharacterized protein LOC102577679 [Solanum tuberosum]          |
| VIT_18s0041g01560 | unnamed protein product                                           |
| VIT_18s0041g01570 | PREDICTED: TMV resistance protein N-like                          |
| VIT_18s0041g01580 | PREDICTED: beta-amyrin 28-oxidase                                 |
| VIT_18s0041g01590 | PREDICTED: beta-amyrin 28-oxidase                                 |
| VIT_18s0041g01600 | unnamed protein product                                           |
| VIT_18s0041g01610 | PREDICTED: uncharacterized protein LOC104882743 isoform X2        |
| VIT_18s0041g01620 | PREDICTED: TMV resistance protein N-like isoform X2               |
| VIT_18s0041g01630 | unnamed protein product                                           |
| VIT_18s0041g01640 | unnamed protein product                                           |
| VIT_18s0041g01650 | PREDICTED: TMV resistance protein N-like, partial                 |
| VIT_18s0041g01680 | unnamed protein product                                           |
| VIT_18s0041g01700 | unnamed protein product                                           |
| VIT_18s0041g01710 | PREDICTED: TMV resistance protein N-like, partial                 |
| VIT_18s0041g01720 | unnamed protein product                                           |
| VIT_18s0041g01730 | unnamed protein product                                           |
| VIT_18s0041g01740 | unnamed protein product                                           |
| VIT_18s0041g01750 | PREDICTED: TMV resistance protein N-like                          |
| VIT_18s0041g01770 | unnamed protein product                                           |
| VIT_18s0041g01780 | PREDICTED: cyprosin-like isoform X1                               |
| VIT_18s0041g01790 | PREDICTED: TMV resistance protein N-like                          |
| VIT_18s0041g01800 | PREDICTED: beta-amyrin 28-oxidase                                 |
| VIT_18s0041g01810 | unnamed protein product                                           |
| VIT_18s0041g01820 | unnamed protein product                                           |
| VIT_18s0041g01830 | PREDICTED: glyoxylate/hydroxypyruvate reductase A HPR2 isoform X3 |
| VIT_18s0041g01840 | PREDICTED: uncharacterized protein LOC100263649                   |

|                          |                                                                                         |
|--------------------------|-----------------------------------------------------------------------------------------|
| VIT_18s0041g01860        | unnamed protein product                                                                 |
| VIT_18s0041g01870        | unnamed protein product                                                                 |
| VIT_18s0041g01890        | PREDICTED: uncharacterized protein LOC100854818                                         |
| VIT_18s0041g01900        | PREDICTED: elongation factor 1-gamma                                                    |
| VIT_18s0041g01920        | unnamed protein product                                                                 |
| VIT_18s0041g01930        | PREDICTED: pentatricopeptide repeat-containing protein At4g14050,<br>mitochondrial-like |
| VIT_18s0041g01940        | PREDICTED: uncharacterized protein LOC100260177 isoform X1                              |
| VIT_18s0041g01980        | unnamed protein product                                                                 |
| VIT_18s0041g02010        | PREDICTED: putative 12-oxophytodienoate reductase 11                                    |
| VIT_18s0041g02020        | PREDICTED: putative 12-oxophytodienoate reductase 11                                    |
| VIT_18s0041g02040        | PREDICTED: putative 12-oxophytodienoate reductase 11                                    |
| VIT_18s0041g02050        | PREDICTED: putative 12-oxophytodienoate reductase 11                                    |
| VIT_18s0041g02060        | PREDICTED: putative 12-oxophytodienoate reductase 11                                    |
| VIT_18s0041g02070        | PREDICTED: putative 12-oxophytodienoate reductase 11                                    |
| VIT_18s0041g02080        | PREDICTED: putative 12-oxophytodienoate reductase 11                                    |
| VIT_18s0041g02090        | unnamed protein product                                                                 |
| VIT_18s0041g02100        | unnamed protein product                                                                 |
| VIT_18s0041g02110        | PREDICTED: uncharacterized protein LOC100265490 isoform X1                              |
| VIT_18s0041g02120        | PREDICTED: TMV resistance protein N-like                                                |
| VIT_18s0041g02130        | unnamed protein product                                                                 |
| <b>VIT_18s0041g02140</b> | <b>PREDICTED: agamous-like MADS-box protein AGL12</b>                                   |
| VIT_18s0041g02150        | unnamed protein product                                                                 |
| VIT_18s0041g02160        | PREDICTED: GDSL esterase/lipase At1g33811                                               |
| VIT_18s0041g02170        | PREDICTED: uncharacterized protein LOC100241456 isoform X1                              |
| VIT_18s0041g02180        | PREDICTED: uncharacterized protein LOC100246577                                         |
| VIT_18s0041g02190        | PREDICTED: protein DA1-related 4-like                                                   |
| VIT_18s0041g02200        | unnamed protein product                                                                 |
| VIT_18s0041g02210        | PREDICTED: TMV resistance protein N-like                                                |
| VIT_18s0041g02220        | PREDICTED: uncharacterized protein LOC100249874                                         |
| VIT_18s0041g02230        | unnamed protein product                                                                 |
| VIT_18s0041g02240        | unnamed protein product                                                                 |
| VIT_18s0041g02250        | unnamed protein product                                                                 |
| VIT_18s0041g02260        | hypothetical protein VITISV_011309                                                      |

|                          |                                                                   |
|--------------------------|-------------------------------------------------------------------|
| VIT_18s0041g02270        | unnamed protein product                                           |
| VIT_18s0041g02290        | unnamed protein product                                           |
| VIT_18s0041g02300        | unnamed protein product                                           |
| VIT_18s0041g02310        | unnamed protein product                                           |
| VIT_18s0041g02320        | unnamed protein product                                           |
| VIT_18s0041g02330        | unnamed protein product                                           |
| VIT_18s0041g02350        | unnamed protein product                                           |
| VIT_18s0041g02360        | unnamed protein product                                           |
| VIT_18s0041g02370        | unnamed protein product                                           |
| VIT_18s0041g02380        | unnamed protein product                                           |
| VIT_18s0041g02390        | unnamed protein product                                           |
| VIT_18s0041g02400        | unnamed protein product                                           |
| <b>VIT_18s0041g02410</b> | <b>PREDICTED: abscisic-aldehyde oxidase-like</b>                  |
| VIT_18s0041g02440        | PREDICTED: TMV resistance protein N-like                          |
| VIT_18s0041g02450        | unnamed protein product                                           |
| VIT_18s0041g02470        | PREDICTED: putative disease resistance protein At4g11170, partial |
| VIT_18s0089g00010        | unnamed protein product                                           |
| VIT_18s0089g00020        | unnamed protein product                                           |
| VIT_18s0089g00030        | PREDICTED: SCY1-like protein 2                                    |
| VIT_18s0089g00040        | PREDICTED: uncharacterized protein LOC100261885                   |
| VIT_18s0089g00050        | PREDICTED: uncharacterized protein LOC100261885                   |
| VIT_18s0089g00060        | hypothetical protein VITISV_032106                                |
| VIT_18s0089g00070        | unnamed protein product                                           |
| VIT_18s0089g00080        | unnamed protein product                                           |
| VIT_18s0089g00090        | unnamed protein product                                           |
| VIT_18s0089g00100        | unnamed protein product                                           |
| VIT_18s0089g00110        | PREDICTED: uncharacterized protein LOC104877471                   |
| VIT_18s0089g00120        | unnamed protein product                                           |
| VIT_18s0089g00140        | unnamed protein product                                           |
| VIT_18s0089g00160        | PREDICTED: mannan endo-1,4-beta-mannosidase 5                     |
| VIT_18s0089g00170        | PREDICTED: mannan endo-1,4-beta-mannosidase 5                     |
| VIT_18s0089g00180        | unnamed protein product                                           |
| VIT_18s0089g00190        | PREDICTED: mannan endo-1,4-beta-mannosidase 5                     |
| VIT_18s0089g00200        | PREDICTED: mannan endo-1,4-beta-mannosidase 5                     |

|                          |                                                                       |
|--------------------------|-----------------------------------------------------------------------|
| <b>VIT_18s0089g00210</b> | <b>PREDICTED: endoglucanase 3</b>                                     |
| VIT_18s0089g00220        | PREDICTED: splicing factor 3B subunit 4                               |
| VIT_18s0089g00250        | unnamed protein product                                               |
| VIT_18s0089g00260        | PREDICTED: pentatricopeptide repeat-containing protein At1g71420-like |
| VIT_18s0089g00270        | PREDICTED: TMV resistance protein N-like                              |
| VIT_18s0089g00280        | hypothetical protein VITISV_026446                                    |
| VIT_18s0089g00290        | PREDICTED: pentatricopeptide repeat-containing protein At1g71420-like |
| VIT_18s0089g00300        | unnamed protein product                                               |
| VIT_18s0089g00310        | PREDICTED: uncharacterized protein LOC100854344                       |
| VIT_18s0089g00340        | PREDICTED: uncharacterized protein slp1                               |
| VIT_18s0089g00350        | PREDICTED: dynamin-2A                                                 |
| VIT_18s0089g00360        | PREDICTED: eukaryotic translation initiation factor 2D                |
| VIT_18s0089g00370        | PREDICTED: probable carboxylesterase 18                               |
| VIT_18s0089g00380        | PREDICTED: probable carboxylesterase 18                               |
| VIT_18s0089g00390        | PREDICTED: probable carboxylesterase 18                               |
| VIT_18s0089g00400        | PREDICTED: probable carboxylesterase 18                               |
| VIT_18s0089g00410        | sucrose-phosphate synthase 1                                          |
| VIT_18s0089g00420        | unnamed protein product                                               |
| VIT_18s0089g00450        | PREDICTED: TMV resistance protein N-like isoform X1                   |
| VIT_18s0089g00460        | unnamed protein product                                               |
| VIT_18s0089g00490        | unnamed protein product                                               |
| VIT_18s0089g00500        | unnamed protein product                                               |
| VIT_18s0089g00510        | unnamed protein product                                               |
| VIT_18s0089g00520        | PREDICTED: TMV resistance protein N-like isoform X1                   |
| VIT_18s0089g00530        | unnamed protein product                                               |
| VIT_18s0089g00540        | unnamed protein product                                               |
| VIT_18s0089g00550        | PREDICTED: TMV resistance protein N-like                              |
| VIT_18s0089g00560        | hypothetical protein VITISV_022891                                    |
| VIT_18s0089g00570        | unnamed protein product                                               |
| VIT_18s0089g00590        | hypothetical protein VITISV_022891                                    |
| VIT_18s0089g00600        | PREDICTED: TMV resistance protein N-like isoform X1                   |
| VIT_18s0089g00610        | PREDICTED: uncharacterized protein LOC100248177                       |
| VIT_18s0089g00620        | PREDICTED: glycerophosphodiester phosphodiesterase GDPD4 isoform X2   |
| VIT_18s0089g00630        | PREDICTED: receptor-like protein 12                                   |

|                          |                                                                   |
|--------------------------|-------------------------------------------------------------------|
| <i>VIT_18s0089g00650</i> | PREDICTED: receptor-like protein 12                               |
| <i>VIT_18s0089g00660</i> | PREDICTED: LRR receptor-like serine/threonine-protein kinase GSO1 |
| <i>VIT_18s0089g00680</i> | PREDICTED: receptor-like protein 12                               |
| <i>VIT_18s0089g00690</i> | PREDICTED: receptor-like protein 12                               |
| <i>VIT_18s0089g00700</i> | PREDICTED: cytochrome P450 714C2-like                             |
| <i>VIT_18s0089g00710</i> | hypothetical protein VITISV_039240                                |
| <i>VIT_18s0089g00720</i> | hypothetical protein VITISV_030083                                |
| <i>VIT_18s0089g00730</i> | hypothetical protein VITISV_030084                                |
| <i>VIT_18s0089g00740</i> | hypothetical protein VITISV_012392                                |

**Table S5.** Primer sequences used in qRT-PCR analysis

| <b>Gene ID</b>           | <b>Forward Primers (5'-3')</b> | <b>Reverse Primers (5'-3')</b> |
|--------------------------|--------------------------------|--------------------------------|
| <i>VIT_18s0041g00700</i> | ATCGGGTGATTGGAGTGAAG           | TGGCTGGTTTCTTCTCTCGT           |
| <i>VIT_18s0041g02140</i> | GACCAAGCCAAAGAAGCACA           | ATTGTTCCAGCCCCACCT             |
| <i>VIT_18s0041g02410</i> | TGGGAACACGAAAGATGGAT           | ATTGACAAGAGCCGAGAAGAGT         |
| <i>VIT_18s0089g00210</i> | GCGGGTGACAATGTGAAGTT           | TTGATGAGGTAGTCCGTGGC           |
| <i>Vvactin</i>           | CTTGCATCCCTCAGCACCTT           | TCCTGTGGACAATGGATGGA           |
